# Supplementary material for: Epigenetic Reprogramming by Decitabine in Retinoblastoma
Source: Preprints.org preprint supplement (doi:10.20944/preprints202404.1746.v1), 2024-04-26
Supplement: Supplementary file 1 [file supplementary]

**Supplementary Table 2****List of Primers for RT-qPCR analysis.**

| qPCR  | Primer  | Sequence                      |
|-------|---------|-------------------------------|
| RELA  | Forward | 5'-TTGAGGTGTATTTCACGGGACC-3'  |
|       | Reverse | 5'-GCACATCAGCTTGCGAAAAGG-3'   |
| HSF1  | Forward | 5'-CATGAAGCATGAGAATGAGGCT-3'  |
|       | Reverse | 5'-ACTGCACCAGTGAGATCAGGA-3'   |
| CASP8 | Forward | 5'-TTTCTGCCTACAGGGTCATGC-3'   |
|       | Reverse | 5'-TGTCCAACCTTCCTTCTCCCA-3'   |
| BAX   | Forward | 5'-TTTCCGAGTGGCAGCTGACAT-3'   |
|       | Reverse | 5'-TTCTGATCAGTTCCGGCACCTT-3'  |
| TRAP2 | Forward | 5'-TGCCTGTGGCATAGTGAACCTCT-3' |
|       | Reverse | 5'-AAGCCAAGCCTAGCCCAAAGAT-3'  |
| BIRC5 | Forward | 5'-GCTGTTTTGATTCCCGGGCTTA-3'  |
|       | Reverse | 5'-AGATTCAACAGGCACCTGCCAA-3'  |

|        |         |                               |
|--------|---------|-------------------------------|
| RRAD   | Forward | 5'-CAATGTCCAGGCGCTGTTTGAA-3'  |
|        | Reverse | 5'-AAAGGCCATCTTGCGGCTGTTA-3'  |
| TRAF2  | Forward | 5'-TGTGCCTGCGTATCTACCTGAA-3'  |
|        | Reverse | 5'-TCAATCACGTGCTCCCGGTTAT-3'  |
| TOLLIP | Forward | 5'-TGGCCAAGAATTACGGCATGAC-3'  |
|        | Reverse | 5'-ACCGTGCAGTGGATGACCTTAT-3'  |
| P73    | Forward | 5'-TACTGCCAGATCGCCAAGACAT-3'  |
|        | Reverse | 5'-CGTGCTCCGCTTTCTTGTA AAC-3' |
| DAP3   | Forward | 5'-AGTGGCCGTGGATGGAATCAAT-3'  |
|        | Reverse | 5'-GCGCCTCCATGCCAATCATTTT-3'  |

|         |         |                              |
|---------|---------|------------------------------|
| CASP6   | Forward | 5'-AAGTGTCACAGCCTGGTTGGAA-3' |
|         | Reverse | 5'-AGGCTGCATCCACCTCAGTTAT-3' |
| BCL_XL  | Forward | 5'-TGCAGGTATTGGTGAGTCGGAT-3' |
|         | Reverse | 5'-TTGAAGCGTTCCTGGCCCTTT-3'  |
| FAS     | Forward | 5'-AAAGCTAGGGACTGCACAGTCA-3' |
|         | Reverse | 5'-GTCCGGGTGCAGTTTATTTCCA-3' |
| BIK     | Forward | 5'-TGGAGGTTCTTGGCATGACTGA-3' |
|         | Reverse | 5'-ACTGCCCTCCATGCATTCCAAA-3' |
| b-actin | Forward | 5'-TGCGTGACATTAAGGAGAAG-3'   |
|         | Reverse | 5'-GCTCGTAGCTCTTCTCCA-3'     |

***List of primers for Methylation-specific PCR (MSP)***

| MSP                | Primer    | Sequence                              |
|--------------------|-----------|---------------------------------------|
| CASP8 <sup>1</sup> | M-Forward | 5'-GTT GGT TTT ATT TAG TTC GGC-3'     |
|                    | M-Reverse | 5'-CCC TAT CGA TAA CAA ATA ATA TAC-3' |
|                    | U-Forward | 5'-GTT GGT TTT ATT TAG TTT GGT-3'     |
|                    | U-Reverse | 5'-CCC TAT CAA TAA CAA ATA ATA TAC-3' |
| FAS                | M-Forward | 5'-AGTTTCGGCGTTTTTCGGAGATTATTGC-3'    |
|                    | M-Reverse | 5'-CACCCGCGCCGAAACGAACC-3'            |
|                    | U-Forward | 5'GGTAGTTTTGGTGTTTTTTGGAGATTATTGT-3'  |
|                    | U-Reverse | 5'-CACCCACACCAAAACAAACCTTTAAC-3'      |
| BIK                | M-Forward | 5' -GGGAGTCGTGTTTAGGTTTTATC-3'        |
|                    | M-Reverse | 5'-GAACAAAAAAAATACGTTTCGAA-3'         |
|                    | U-Forward | 5' -GGGGAGTTGTGTTT AGGTTTTATT-3'      |
|                    | U-Reverse | 5'-CAAACAAAAAAAATACATTTCAAA-3'        |
| RRAD               | M-Forward | 5'-GGTTTTAGGGTGTGTTGTTTCGAC-3'        |
|                    | M-Reverse | 5'-CGAATTCCTAATCCCCTAAACGAT-3'        |

|      |           |                                  |
|------|-----------|----------------------------------|
|      | U-Forward | 5'-GGGTTTTAGGGTGTGTTGTTTTGAT-3'  |
|      | U-Reverse | 5'-TCAAATTCCTAATCCCCTAAACAAT-3'  |
| P73  | M-Forward | 5'-GGACGTAGCGAAATCGGGGTTC-3'     |
|      | M-Reverse | 5'-ACCCCGAACATCGACGTCCG-3'       |
|      | U-Forward | 5'-AGGGGATGTAGTGAAATTGGGGTTT-3'  |
|      | U-Reverse | 5'-ATCACAACCCCAAACATCAACATCCA-3' |
| DAP3 | M-Forward | 5'-AGTTATTTTCGTACGCGTTTATTTAC-3' |
|      | M-Reverse | 5'-ACGACGACTACTTTAACGACGAT-3'    |
|      | U-Forward | 5'-TTATTTTGTATGTGTTTATTTATGG-3'  |
|      | U-Reverse | 5'-AACAACAACACTACTTTAACAACAAT-3' |
