# Supplementary material for: Epigenetic Reprogramming by Decitabine in Retinoblastoma
Source: Preprints.org preprint supplement (doi:10.20944/preprints202404.1746.v1), 2024-04-26
Supplement: Supplementary file 5 [file supplementary]

**TABLE S1. International intraocular Retinoblastoma classification (IIRC) of primary retinoblastoma included in our study**

| International intraocular Retinoblastoma classification (IIRC)                                                                                                                                                                                                           |                                  |       |                                                                                                                                                                                                                                                                                                                                                   |
|--------------------------------------------------------------------------------------------------------------------------------------------------------------------------------------------------------------------------------------------------------------------------|----------------------------------|-------|---------------------------------------------------------------------------------------------------------------------------------------------------------------------------------------------------------------------------------------------------------------------------------------------------------------------------------------------------|
| Subject included in our study                                                                                                                                                                                                                                            | Familiarity                      | CLASS | • Features<br>(10.3126/nepjoph.v9i1.17524)                                                                                                                                                                                                                                                                                                        |
| RB025<-GSM5883725_RB025/" Primary Retinoblastoma -scRNA-Seq;<br><br>RB026<-GSM5883726_RB026/" Primary Retinoblastoma -scRNA-Seq;<br><br>RB027<-GSM5883727_RB027/" Primary Retinoblastoma -scRNA-Seq;<br><br>RB029<-GSM5883729_RB029/" Primary Retinoblastoma -scRNA-Seq; | NO<br><br>NO<br><br>NO<br><br>NO | E     | <ul style="list-style-type: none"> <li>• Irreversible neurovascular glaucoma</li> <li>• Massive intraocular haemorrhage</li> <li>• Aseptic orbital cellulitis</li> <li>• Tumor anterior to anterior vitreous face</li> <li>• Tumor touching the lens</li> <li>• Diffuse infiltrating retinoblastoma</li> <li>• Phthisis or prephthisis</li> </ul> |
| RB028 <-GSM5883728_RB028/" Primary Retinoblastoma -scRNA-Seq;                                                                                                                                                                                                            | NO                               | D     | <ul style="list-style-type: none"> <li>• Massive and/or intraocular disseminated disease</li> <li>• More than one quadrant of retinal detachment</li> <li>• Fine greasy vitreous seeding or avascular masses</li> <li>• Subretinal seeding plague - like</li> </ul>                                                                               |
